# Supplementary material for: Montmorillonite K10-Catalyzed Solvent-Free Conversion of Furfural into Cyclopentenones
Source: Preprints.org preprint supplement (doi:10.20944/preprints201902.0221.v1), 2019-02-25
Supplement: Supplementary file 1 [file supplementary]

Montmorillonite K10-catalyzed solvent-free conversion of furfural into cyclopentenones

Sonia Bonacci 1, Monica Nardi 1, *, Paola Costanzo 1, Antonio De Nino 3, Maria Luisa Di Gioia 2,Manuela Oliverio 1 and Antonio Procopio 1

1 Dipartimento di Scienze della Salute, Università Magna Græcia, Viale Europa, Germaneto,
88100 Catanzaro CZ, Italia; s.bonacci@unicz.it (S.B.); monica.nardi@unicz.it (M.N.); pcostanzo@unicz.it (P.C.); m.oliverio@unicz.it (M.O.); procopio@unicz.it (A.P.)

2 Dipartimento di Farmacia e Scienze della Salute e della Nutrizione, Edificio Polifunzionale, Università della Calabria, Arcavacata di Rende, 87030 Cosenza, Italia; ml.digioia@unical.it (M.L.D.G.)

3 Dipartimento di Chimica, Università della Calabria Cubo 12C, 87036 Arcavacata di Rende CS, Italia; antonio.denino@unical.it (A.D.)

***** Correspondence: monica.nardi@unicz.it (M.N.);

Tel. of M.N.: +39-0984-492-850

**Electronic Supplementary Material**

**Table of Contents**

| **Experimental Section** |
| --- |
| **General Experimental Procedure for Microwave-Assisted Cyclitation rearrangement of furfural and amines.**   - ***trans*-4,5-dimorpholinecyclopent-2-en-1-one** - ***trans*-4,5-di(pyrrolidin-1-yl)cyclopent-2-en-1-one** - ***trans*-4,5-di(piperidin-1-yl)cyclopent-2-en-1-one** - ***trans*-4,5-di(isoindolin-2-yl)cyclopent-2-en-1-one** - ***trans*-4,5-bis(diisobutylamino)cyclopent-2-enone** - ***trans-*4,5-bis(diallylamino)cyclopent-2-enone** - ***trans*-4,5-bis(dibenzylamino)cyclopent-2-en-1-one** - ***trans*-4,5-bis(allyl(phenyl)amino)cyclopent-2-enone** - ***trans*-4,5-bis(methyl(phenyl)amino)cyclopent-2-enone** |
| **General protocol for the synthesis of 2,4 diamorpholinecyclopent-2-enones.**   - **2,4 diamorpholinecyclopent-2-enones** |

Experimental section

All chemicals and solvents were purchased from common commercial sources and were used as received without any further purification. Montmorillonite K10 clay obtained from Aldrich, has the following chemical composition (wt%) SiO2: 67.6; Al2O3: 14.6; Fe2O3: 2.9; MgO: 1.8.

All reactions were monitored by GC-MS. The GC-MS Shimadzu workstation was constituted by a GC 2010 (equipped with a 30 m-QUADREX 007-5MS capillary column, operating in the “split” mode, 1 mL min-1 flow of He as carrier gas).

Proton nuclear magnetic resonance (1H-NMR) spectra were recorded on a Brüker spectrometer at 300 MHz. Chemical shifts are reported in δ units (ppm) with tretramethylsilane (TMS) as reference (δ 0.00). All coupling constants (*J*) are reported in Hertz. Multiplicity is indicated by one or more of the following: s (singlet), d (doublet), t (triplet), q (quartet), m (multiplet). Carbon nuclear magnetic resonance (13C-NMR) spectra were recorded on a Brüker at 75 MHz. Chemical shifts are reported in δ units (ppm) relative to CDCl3 (δ 77.0).

MW-assisted reactions were performed on a Synthos 3000 instrument from Anton Paar, equipped with a 4 × 24MG5 Rotor and an IR probe used for external temperature control.

**General Experimental Procedure for Microwave-Assisted Cyclitation rearrangement of furfural and amines.**

The morpholine (2 mmol) was added to a stirred solution of furfural (1 mmol) and MK10 (20 mg). The resulting mixture was reacted for 5 min in a Synthos 3000 microwave instrument, fixed on the temperature value of 60 °C (IR Limit).

After completion of the reaction (monitored by GCMS), the MK10 was separated from the reaction mixture by filtration and washed with ethyl acetate (3 mL) for four times. The products were isolated after evaporation of the solvent to afford compounds in 90-99 % yields. Spectral data were in accordance with the literature [57].

The reaction of morpholine with furfural was scaled up to grams using 20 mmol of furfural and 40 mmol of morpholine with amount corresponding of MK10. After completion of the reaction and separation of MK10, the product were obtained with a yield of 97%.

***trans*-4,5-dimorpholinecyclopent-2-en-1-one:** Spectral data were in accordance with the literature [57].

***trans*-4,5-di(pyrrolidin-1-yl)cyclopent-2-en-1-one:** Spectral data were in accordance with the literature [57] .

***trans*-4,5-di(piperidin-1-yl)cyclopent-2-en-1-one:** Spectral data were in accordance with the literature [57].

***trans*-4,5-di(isoindolin-2-yl)cyclopent-2-en-1-one:** Spectral data were in accordance with the literature[57].

***trans*-4,5-bis(diisobutylamino)cyclopent-2-enone:** Spectral data were in accordance with the literature [55].

***trans-*4,5-bis(diallylamino)cyclopent-2-enone:** Spectral data were in accordance with the literature [52].

***trans*-4,5-bis(dibenzylamino)cyclopent-2-en-1-one:** Spectral data were in accordance with the literature [57].

***trans*-4,5-bis(allyl(phenyl)amino)cyclopent-2-enone**: Spectral data were in accordance with the literature [52].

***trans*-4,5-bis(methyl(phenyl)amino)cyclopent-2-enone**: Spectral data were in accordance with the literature [52].

**General protocol for the synthesis of 2,4 dimorpholinecyclopent-2-enones.**

After perfomed the 4,5-trans-dimorpholinecyclopen-2-enone as the reported procedure, to reaction mixture we added 0,2 mmol of morpholine and kept at room temperature for further 1 hour. After completion, ethyl acetate was added (3 mL), the catalyst was filtrate and the product isolate after evaporation of the solvent to afford 2,4-dimorpholinecyclopent-2-enone in 99 % yields. Spectral data were in accordance with the literature [57].
